# Supplementary material for: How effective have Canadian national parks been at preventing landscape fragmentation?
Source: Research Square preprint supplement (doi:10.21203/rs.3.rs-7844413/v1), 2025-11-24
Supplement: Supplementary file 1 [file bae89f5844993a1a07a24569.pdf]

*Supplementary material for*

**“How effective have Canadian national parks been at preventing landscape fragmentation?”**

**S1 – Map showing the location of the control area for Nááts'ihch'oh NPR in comparison to the park reserve**

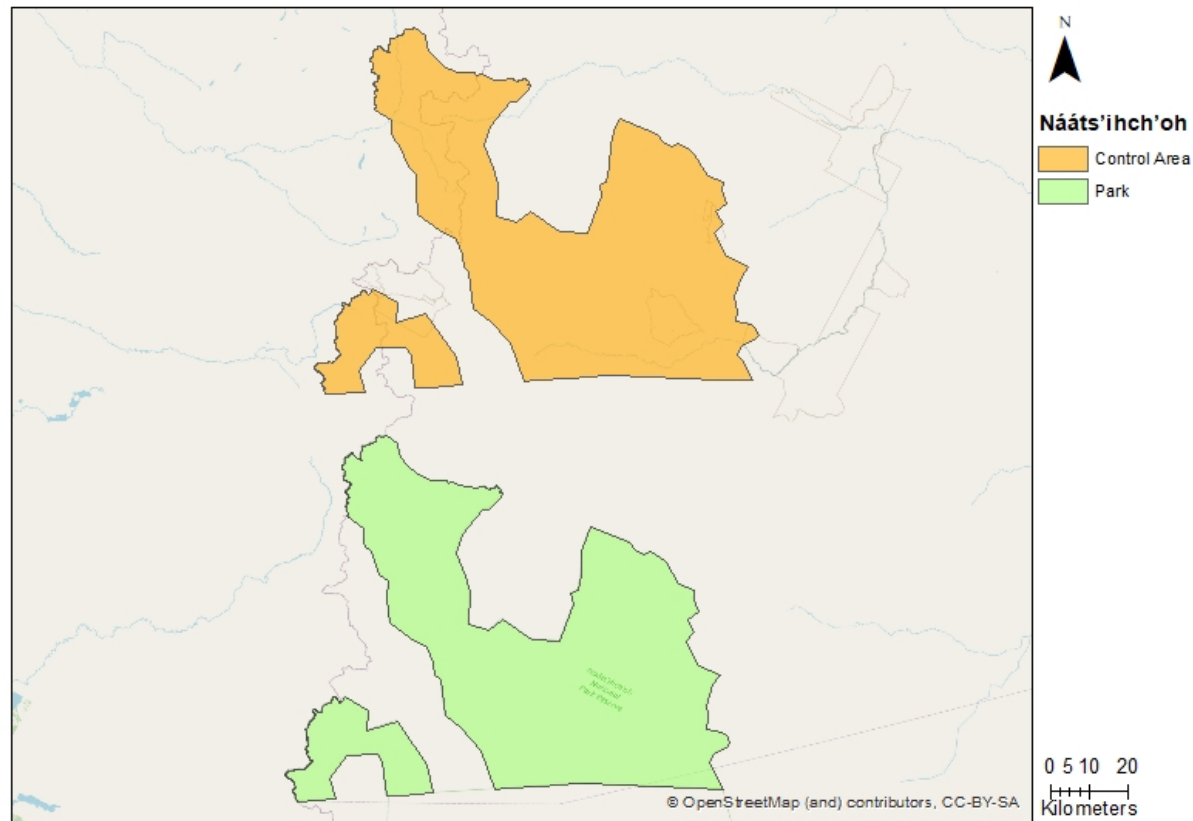

## S2 – Data suitability table

| Data                                                                 | Suitable time-step? | Complete coverage of NPs and CAs? | Consistent definitions of fragmenting elements? | Consistent resolution? | Inclusion of data for all FGs? |
|----------------------------------------------------------------------|---------------------|-----------------------------------|-------------------------------------------------|------------------------|--------------------------------|
| CanVec Series                                                        | 2021                | Yes                               | Yes                                             | Yes                    | Yes                            |
| Open Database of Buildings                                           | 2020                | Yes                               | Yes                                             | Yes                    | NA <sup>1</sup>                |
| Annual Crop Inventory                                                | 2009-2020           | Yes                               | Yes                                             | Yes                    | NA                             |
| CanVec Series                                                        | 2013                | Yes                               | Yes                                             | Yes                    | Yes                            |
| CanMatrix Series                                                     | 1944-2012           | Yes                               | Yes                                             | Yes                    | Yes                            |
| Surveys and Mapping Branch.<br>Energy, Mines and Resources<br>Canada | 1954-1987           | Yes                               | Yes                                             | Yes                    | Yes                            |
| Department of the Interior                                           | 1921-1931           | No <sup>2</sup>                   | Yes                                             | Yes                    | Yes                            |

## S3- CBC buffer zone creation process using literature about caribou movement

| Range of daily movement (km) | Source                  |
|------------------------------|-------------------------|
| 2.3-9.1                      | Poole et al., 2010      |
| 2                            | Pedersen et al., 2021   |
| 0.26-0.69                    | Wakkinen & Sloane, 2010 |
| 2.8-18                       | Person et al., 2007     |
| 5.8-15.9                     | Gunn et al., 2013       |
| 2-11.5                       | Russell & Gunn, 2019    |
| Mean of ranges: 9.13km       |                         |

<sup>1</sup> Data denoted as NA is not needed in any or all fragmentation geometries related to human impacts (i.e. FGs 1 & 2)

<sup>2</sup> Gaps in geographic coverage filled with alternative maps – see S8 for map list

#### **S4 - CUT and CBC procedure: Fragmentation near the boundaries of national parks**

Overall, the CBC procedure is more appropriate for this study because it does not consider the boundaries of the parks and control areas as physical barriers. This is particularly useful for inland parks that have multiple sections to them, such as Grasslands and Nááts'ihch'oh. However, the CUT and CBC results can be compared to gauge the effect of fragmentation adjacent to the parks and park reserves. Studying the land adjacent to protected areas gives an idea of how a park can be affected by processes that occur outside its boundaries, and how isolated the wildlife populations might be from any surrounding natural area (Soverel et al., 2010; Parks Canada 2023b). Pairs that have a greater negative effect size for the CBC procedure than the CUT indicate that there is more fragmentation in the 10 km buffer zone of the park in comparison to within the park boundary, and vice versa, since the divergence of effective mesh size can be compared between the CUT and CBC. This is the case for almost all park-control pairs with the exception of Prince Albert (Figure S4a). The fragmentation level change is greater within the boundaries of Prince Albert NP than in the buffer zone. The parks with the strongest indication of increased fragmentation just outside their boundaries in the greater park ecosystem are primarily in south-eastern Canada: Kouchibouguac, La Mauricie, Gros Morne, Pukaskwa, and Bruce Peninsula. This generally follows the findings of Leroux & Kerr (2013), that small park sizes and proximity to urban areas in the south of Canada encourage development close to and into the boundaries of protected areas.

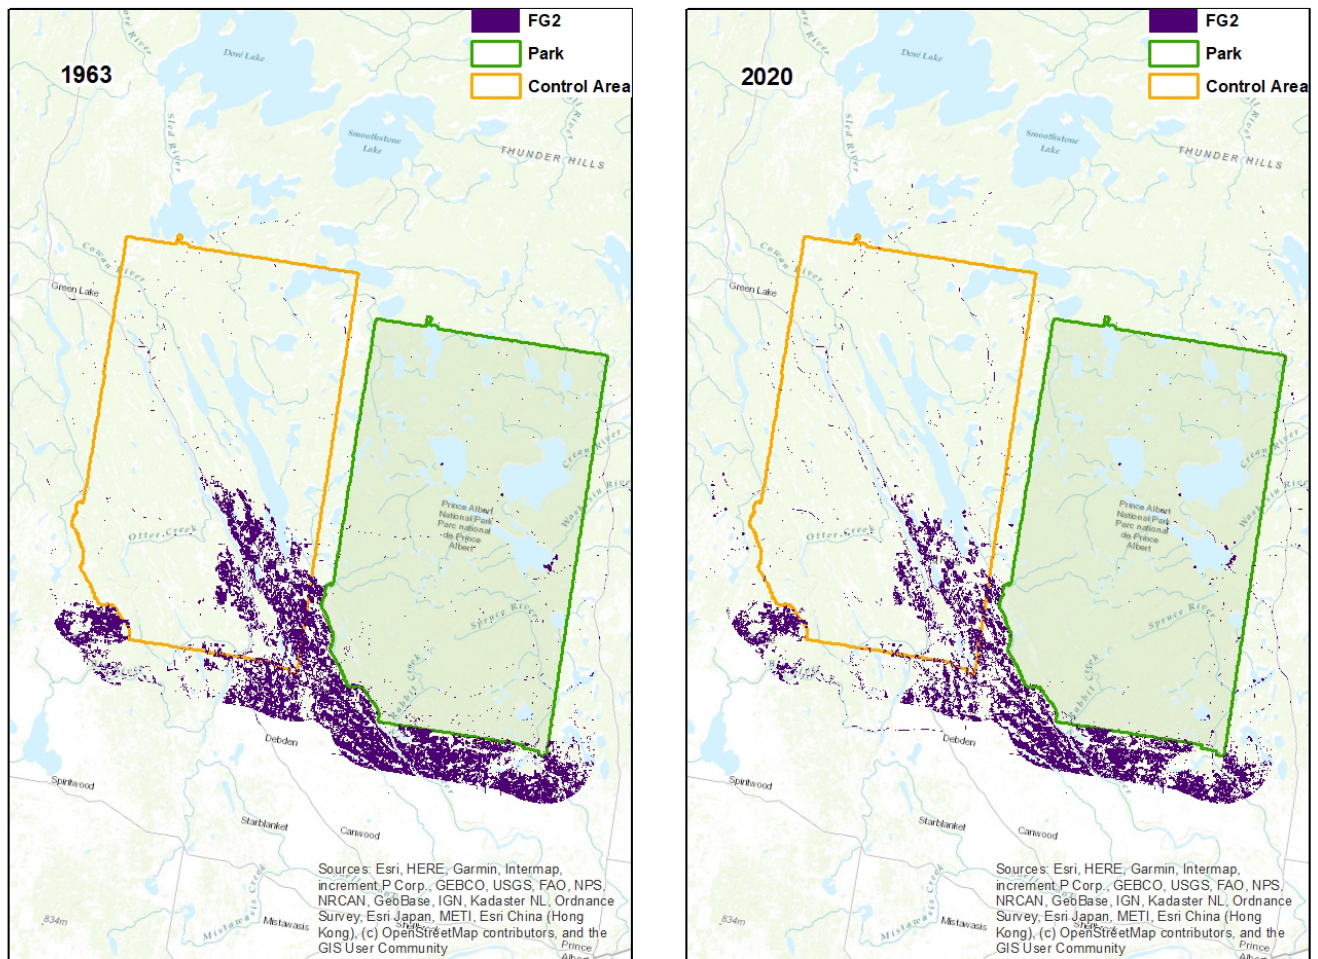

**Figure S4a-** FG2 for Prince Albert NP and its associated control area, in 1963 and 2020. There is a greater reduction of fragmenting barriers in the park's buffer zone than within its boundaries, along with a large reduction of fragmenting barriers in the control area and its buffer zone. Therefore, the effect size for the CUT procedure ( $-0.874 \text{ km}^2/\text{yr}$ ) is larger than for the CBC ( $-0.816 \text{ km}^2/\text{yr}$ ).

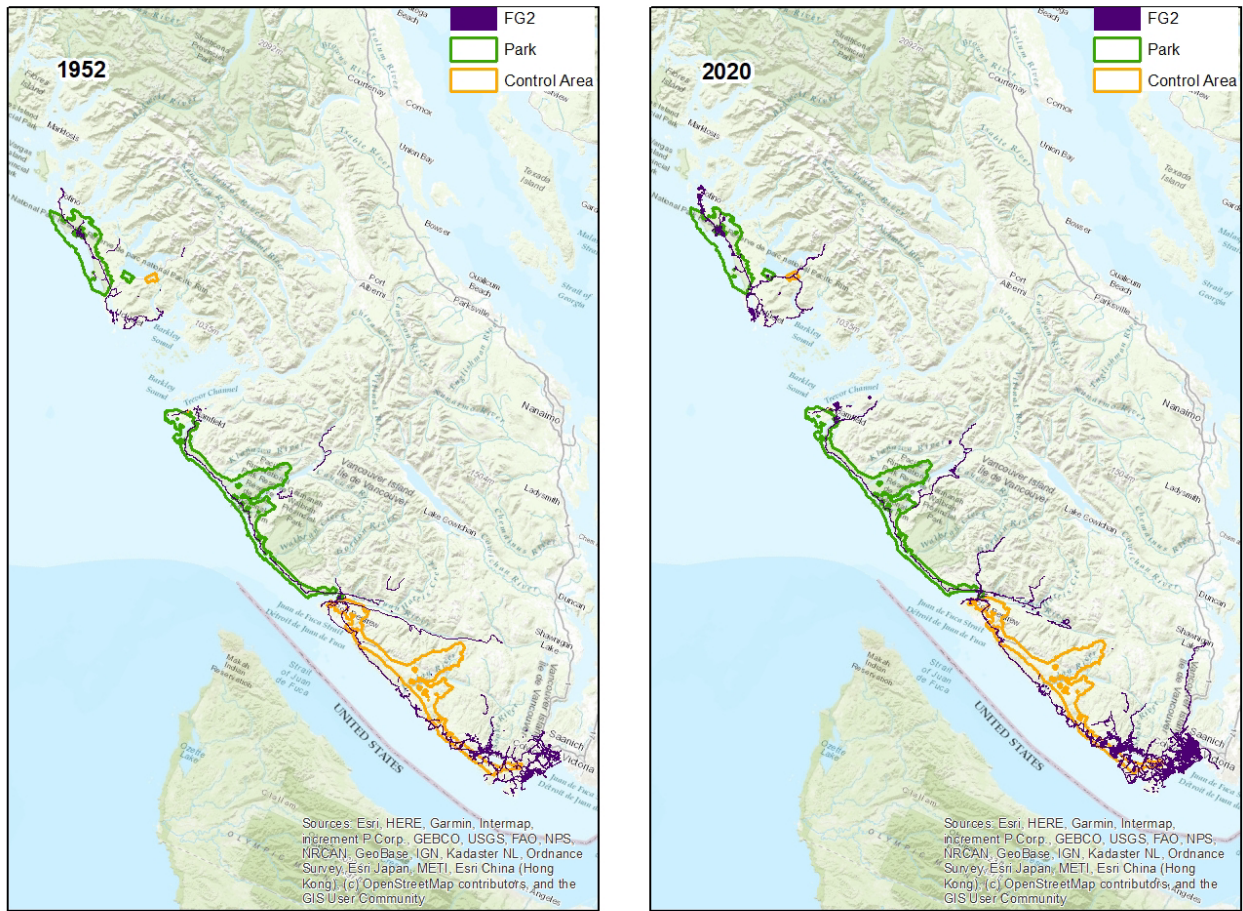

**Figure S4b-** FG2 for Pacific Rim NPR and part of its associated control area, in 1952 and 2020. There is a greater increase of fragmenting barriers in the NPR than in its buffer zone, and a greater increase of fragmenting barriers in the buffer zone of the control area in comparison to within its boundaries. Therefore, there is a negative effect size for the CUT procedure ( $-0.0437 \text{ km}^2/\text{yr}$ ) and a positive effect size for the CBC ( $0.168 \text{ km}^2/\text{yr}$ ).

For the majority of park-control pairs, trends in effective mesh size change for both the CUT and CBC procedures were similar, indicating that fragmentation around the parks may increase pressure for fragmentation and development within the park boundaries (Leroux & Kerr, 2013). However, the Pacific Rim park-control pair (Figure S4b) has a negative direction of effect size for the CUT procedure, and positive for the CBC procedure. The CUT results show that Pacific Rim NPR has had more fragmentation over time than its control area, and vice versa with the CBC results. This is due to an increase in tourist facilities within Pacific Rim NPR but not adjacent to its boundaries, and a significant increase in the suburban built-up areas of Victoria in the buffer zone of the control area in comparison to the smaller effect of the expansion of Tofino and Ucluelet near the park.



## **S5 - Examples: Keystone species and species at particular risk from fragmentation, and their history in the park-control pairs**

Many parks have keystone species significantly affected by landscape fragmentation in the protected areas and greater park ecosystems of the park buffer zones and control areas. For example, Banff has undertaken a Plains Bison Reintroduction Pilot, to support Parks Canada's goals in maintaining and restoring ecological integrity. Free roaming plains bison (*Bison bison bison*) became locally extinct in Banff by the 1870s due to overhunting, but are important to the native ecosystem of the park as their presence affects the landscape in ways that benefit other species (Parks Canada, 2018; Parks Canada, n.d.). The new bison herd movement has been influenced by interventions such as drift fences in order to keep the herd within their reintroduction zone, however their movement in the first five years of reintroduction shows their attraction to areas outside of Banff NP at Ya Ha Tinda and the Panther River valley (Parks Canada, 2023a). Keeping landscape fragmentation low in and around the eastern slopes of Banff NP will be crucial in future range and population management for the herd. A similar reintroduction program for plains bison has occurred at Grasslands NP, with the herd originating from Elk Island NP. Elk Island is the only entirely fenced national park, in order to maintain the disease-free status of the plains bison and wood bison (*Bison bison athabasca*) population. This fencing, and the traffic on Highway 16 split the park into two blocks that are ecologically independent of one another and independent of the surrounding buffer zone, and it contributes to the park's challenges of overabundant bison, elk (*Cervus canadensis manitobensis*) and moose (*Alces alces andersoni*) (Parks Canada, 2023c).

Another keystone species that is native to a wide range of park-control pairs is the caribou. The caribou's keystone status and its sensitivity to landscape fragmentation and human disturbance led to the creation of the 10km buffer zone for the parks and control areas in the present study. Logging, road development and associated industrial and recreational access bring increased hunter access, and altered predator-prey balances have displaced Mountain, Boreal, Atlantic and Newfoundland caribou (*Rangifer tarandus caribou*), affected their habitats and retracted their ranges (Adamczewski et al., 2003; Apps & McLellan, 2006; Arlt & Manseau, 2011). The study shows the increasing landscape fragmentation and human pressures on the Rocky Mountain national parks and eastern national parks, which affect caribou access to undisturbed ranges. Actions taken by Parks Canada to reduce harm to caribou include mitigation measures and closures of roads, recreation areas, and trails in Gros Morne, Jasper, Glacier and Mount Revelstoke (Parks Canada, 2023d). The Peary Caribou (*Rangifer tarandus arcticus*) historical habitat that includes Quttinirpaaq, Qausuittuq and Aulavik is essentially all available and has not been lost or fragmented by anthropogenic developments (COSEWIC, 2015). This can be seen by the small effect sizes in both the CUT and CBC procedures for these parks. This is also mostly the case for other Barren-ground

caribou, with their range covering Ivvavik, Vuntut, Tuktut Nogait, Thaidene Nënë, Ukkusiksalik, Sirmilik and Auyuittuq.

Mammals are not the only animals affected by landscape fragmentation in the park-control pairs. The wood turtles (*Glyptemys insculpta*) native in and around La Mauricie NP are particularly sensitive to the human-induced landscape fragmentation that has increased over time, and its status in the park is considered poor (Parks Canada, 2024). The southern part of the greater park ecosystem contains increasing urbanization concentrated around Trois-Rivières (Habitat, 2022). Due to these fragmenting barriers encroaching into the wood turtle’s habitat in the control area and the park buffer zone, actions taken by Parks Canada in the park include installing structures to guide turtles off the road and plant rehabilitation to make medians less attractive to turtles (Parks Canada, 2024).

**Table S5** - Parks that consider landscape fragmentation or related indicators in their ecological integrity monitoring, as found in the most recent State of Park reports or Park Management Plans.

| Park                    | Indicator                                                  |
|-------------------------|------------------------------------------------------------|
| <b>Banff</b>            | Winter wildlife corridors                                  |
| <b>Waterton Lakes</b>   | Sensitive species-secure habitat                           |
| <b>Jasper</b>           | Motorized access density                                   |
| <b>Mount Revelstoke</b> | Wildlife cameras & wildlife tracks                         |
| <b>Point Pelee</b>      | Forest ecosystem monitoring                                |
| <b>Kootenay</b>         | Wildlife cameras & wildlife tracks                         |
| <b>Fundy</b>            | Carnivore habitat connectivity                             |
| <b>Terra Nova</b>       | Wildlife cameras                                           |
| <b>La Mauricie</b>      | Forest landscape monitoring, black bear movement corridors |
| <b>Pacific Rim</b>      | Wildlife habitat fragmentation & anthropogenic development |
| <b>Bruce Peninsula</b>  | Forest & wetland connectivity & abundance                  |
| <b>Wapusk</b>           | Maintaining natural physical processes                     |

## S6 - Landscape fragmentation monitoring within the greater park ecosystems

For the greater park ecosystems (including unprotected land adjacent to the protected areas and control areas), landscape fragmentation monitoring is important but missing in many regions. Remaining natural land cover between protected areas are vulnerable to ongoing landscape fragmentation, as seen in many of

the control areas in this study, leaving the parks and park reserves as increasingly isolated stepping-stones of natural areas within a wider human-influenced landscape (Roch & Jaeger, 2014; Cole et al., 2023). To combat this process, in some parks, Parks Canada is working with other organizations to connect the surrounding landscape. One of the most significant of these is the Landscape Resiliency Program, a collaboration with the Nature Conservancy of Canada, where buffer zones and wildlife corridors adjacent to national parks will be protected by working with local communities. Parks included in this program are Gulf Islands, Waterton Lakes, Grasslands, Bruce Peninsula, Point Pelee, La Mauricie, Kouchibouguac, and Kejimikujik (Nature Conservancy of Canada, 2023).

Other NGOs such as the Y2Y and Staying Connected Initiatives look to protect large swathes of intact habitat, with the NPS acting as cornerstones of the connected landscapes (Staying Connected Initiative, 2023; Yellowstone to Yukon Conservation Initiative, 2024). By focusing on conservation with the wide variety of stakeholders and levels of governance present in a multi-functional landscape outside of a park, these initiatives find success in preventing landscape fragmentation both within and between protected areas (Parrott et al., 2019). Additionally, some provinces are working on monitoring fragmentation and/or connectivity. For example, the government of Alberta and the Alberta Biodiversity Monitoring Institute developed an indicator based on Equivalent Connected Area (Alberta Government, 2024). In Quebec, the Quebec Ecological Corridors Initiative champions ecological corridors in land use planning and advises governments, farmers, and other stakeholders (Nature Conservancy of Canada, 2017).

## S7 – Data used in study

### S7a - Vector datasets

| Name                                |                                                                                                                                                                                                                                                                                                      |
|-------------------------------------|------------------------------------------------------------------------------------------------------------------------------------------------------------------------------------------------------------------------------------------------------------------------------------------------------|
| National Park boundaries            | Parks Canada Agency, G. of C. (2020). <i>Places administered by Parks Canada—Open Government Portal</i> (Version 1) [.shp].<br><a href="https://open.canada.ca/data/en/dataset/e1f0c975-f40c-4313-9be2-beb951e35f4e">https://open.canada.ca/data/en/dataset/e1f0c975-f40c-4313-9be2-beb951e35f4e</a> |
| CanVec – 50k topographic            | Natural Resources Canada. (2020). <i>Topographic Data of Canada—CanVec Series—Open Government Portal</i> [.shp].<br><a href="https://ouvert.canada.ca/data/dataset/8ba2aa2a-7bb9-4448-b4d7-f164409fe056">https://ouvert.canada.ca/data/dataset/8ba2aa2a-7bb9-4448-b4d7-f164409fe056</a>              |
| CanVec – 250k hydrographic features | Natural Resources Canada. (2020). <i>Topographic Data of Canada—CanVec Series—Open Government Portal</i> [.shp].<br><a href="https://ouvert.canada.ca/data/dataset/8ba2aa2a-7bb9-4448-b4d7-f164409fe056">https://ouvert.canada.ca/data/dataset/8ba2aa2a-7bb9-4448-b4d7-f164409fe056</a>              |



|                                                                       |                                                                                                                                                                                                                                                                                                                                                                                                                                                                                                                                                                                               |
|-----------------------------------------------------------------------|-----------------------------------------------------------------------------------------------------------------------------------------------------------------------------------------------------------------------------------------------------------------------------------------------------------------------------------------------------------------------------------------------------------------------------------------------------------------------------------------------------------------------------------------------------------------------------------------------|
| Agriculture – Annual Crop Inventory 2020 & 2013                       | <p>Agriculture and Agri-food Canada. (2020). <i>Annual Crop Inventory—Open Government Portal</i> (Version 1) [.shp]. <a href="https://open.canada.ca/data/en/dataset/ba2645d5-4458-414d-b196-6303ac06c1c9">https://open.canada.ca/data/en/dataset/ba2645d5-4458-414d-b196-6303ac06c1c9</a></p> <p>Agriculture and Agri-food Canada. (2013). <i>Annual Crop Inventory—Open Government Portal</i> (Version 1) [.shp]. <a href="https://open.canada.ca/data/en/dataset/ba2645d5-4458-414d-b196-6303ac06c1c9">https://open.canada.ca/data/en/dataset/ba2645d5-4458-414d-b196-6303ac06c1c9</a></p> |
| Pre-2000s agriculture – Land Cover for Agricultural Regions of Canada | <p>Agriculture and Agri-food Canada. (2009). <i>Land Cover for Agricultural Regions of Canada, circa 2000—Open Government Portal</i> (Version 1) [Raster]. <a href="https://open.canada.ca/data/en/dataset/16d2f828-96bb-468d-9b7d-1307c81e17b8?_ga=2.1988981.515457352.1493845476-1970616929.1493845475">https://open.canada.ca/data/en/dataset/16d2f828-96bb-468d-9b7d-1307c81e17b8?_ga=2.1988981.515457352.1493845476-1970616929.1493845475</a></p>                                                                                                                                        |
| Open Database of Buildings                                            | <p>Statistics Canada, G. of C. (2019). <i>The Open Database of Buildings</i> [.shp]. <a href="https://www.statcan.gc.ca/en/lode/databases/odb">https://www.statcan.gc.ca/en/lode/databases/odb</a></p>                                                                                                                                                                                                                                                                                                                                                                                        |
| Alaska hydrographic features - 100k                                   | <p>U.S. Geological Survey. (2022). <i>National Hydrography Dataset (NHD). State—Alaska</i> [.shp]. <a href="https://www.sciencebase.gov/catalog/item/5136012ce4b03b8ec4025bf7">https://www.sciencebase.gov/catalog/item/5136012ce4b03b8ec4025bf7</a></p>                                                                                                                                                                                                                                                                                                                                      |
| Montana hydrographic features -24k                                    | <p>U.S. Geological Survey, &amp; Montana State Library. (2003). <i>Montana Hydrography Framework (National Hydrography Dataset)</i> [.shp]. <a href="https://mslservices.mt.gov/Geographic_Information/Data/DataList/datalist_Details.aspx?did=%7bdb6c41bd-1f29-48ab-b4aa-2c1890f317e6%7d">https://mslservices.mt.gov/Geographic_Information/Data/DataList/datalist_Details.aspx?did=%7bdb6c41bd-1f29-48ab-b4aa-2c1890f317e6%7d</a></p>                                                                                                                                                       |
| Provincial – 2000s                                                    | <p>Natural Resources Canada. (2014). <i>Topographic Data of Canada—CanVec 1:50,000, 1944-2013—Open Government Portal</i> [.shp]. <a href="https://open.canada.ca/data/en/dataset/be0165a8-ad5d-4adb-a27a-2d4117c3967c">https://open.canada.ca/data/en/dataset/be0165a8-ad5d-4adb-a27a-2d4117c3967c</a></p>                                                                                                                                                                                                                                                                                    |

### S7b - CanMatrix maps for time-step 1970-1999

Natural Resources Canada. (2014). *Digital Topographic Raster Maps—Archived* (Version 4) [Raster]. [https://ftp.maps.canada.ca/pub/nrcan\\_rncan/raster/topographic](https://ftp.maps.canada.ca/pub/nrcan_rncan/raster/topographic)

For full list of maps per park-control pair, please see associated spreadsheet.

### S7c - Topographic NTS maps for time-step 1931-1969

Army Survey Establishment, G. of C., & Borealis. (2022). *Historical National Topographic System (NTS): 1:50,000 Scale Maps, Data and GIS* [Raster]. <https://borealisdata.ca/dataverse/topomaps>

Army Survey Establishment, G. of C., & Natural Resources Canada. (2020). *Historical Topographic Maps: 1:50,000 Index* [Raster]. <https://geo2.scholarsportal.info>

### S7c - Sectional Maps collection at the University of Calgary (SANDS) for time-step pre-1930

SANDS, U. of C. (n.d.). *Sectional Maps, 1 to 3 Mile. 1902 to 1955* [Raster]. <https://sands.ucalgary.ca/App/SectionalMaps/index.html>

**S7d - Other maps used from external collections**

| <b>Name</b>                                      | <b>Year</b> | <b>Scale</b> | <b>Source</b>                                                           | <b>Collection</b>                                                                                       |
|--------------------------------------------------|-------------|--------------|-------------------------------------------------------------------------|---------------------------------------------------------------------------------------------------------|
| Waterton Lakes National Park                     | 1914        | 1:62,500     | Office of the Surveyor General                                          | Historical Maps Collection, Libraries and Cultural Resources Digital Collections, University of Calgary |
| Crowsnest Forest and Waterton Lakes Park sheet 4 | 1914        | 1:62,5000    | Office of the Surveyor General                                          | Historical Maps Collection, Libraries and Cultural Resources Digital Collections, University of Calgary |
| Crowsnest Forest and Waterton Lakes Park sheet 5 | 1914        | 1:62,5000    | Office of the Surveyor General                                          | Historical Maps Collection, Libraries and Cultural Resources Digital Collections, University of Calgary |
| Yoho Park                                        | 1921        | 1:125,000    | Department of the Interior                                              | University of Alberta William C. Wonders Map collection                                                 |
| Mount Revelstoke Park                            | 1923        | 1:125,000    | Department of the Interior                                              | UBC Koerner Library                                                                                     |
| Prince Albert National Park                      | 1923        | na           | Department of the Interior                                              | Canadiana Heritage Reel T-10406                                                                         |
| Jasper National Park                             | 1926        | na           | Department of the Interior, Engineering Service Canadian National Parks | UBC Koerner Library                                                                                     |
| Kootenay National Park                           | 1926        | 1:126,720    | Department of the Interior                                              | Canadiana Heritage Reel T-12420                                                                         |
| Pelee                                            | 1926        | 1:63,360     | Department of National Defence, Geographical Section, General Staff     | McMaster University Map collections - Ontario Historical Topographic Maps                               |
| Waterton Lakes Park                              | 1928        | 1:63,360     | Department of the Interior                                              | UBC Koerner Library                                                                                     |
| Wood Buffalo Park                                | 1931        | 1:506,880    | Department of the Interior                                              | U of T Libraries scanned maps                                                                           |
| Kootenay National Park                           | 1938        | 1:126,720    | Mines and Technical Surveys. Surveys and mapping branch                 | Topographic map cabinets                                                                                |
| Waterton Lakes                                   | 1940        | 1:63,360     | Mines and Technical Surveys. Surveys and mapping branch                 | University of Alberta William C. Wonders Map collection                                                 |
| Wood Buffalo Park                                | 1947        | 1:506,880    | Department of Mines and Resources. Surveys and Engineering Branch.      | U of T Libraries scanned maps                                                                           |
| Prince Albert Park                               | 1951        | 1:150,000    | Mines and Technical Surveys. Surveys and mapping branch                 | University of Alberta William C. Wonders Map collection                                                 |
| Riding Mountain Park                             | 1954        | 1:190,080    | Surveys and Mapping Branch. Energy, Mines and Resources Canada          | UBC Koerner Library                                                                                     |
| Banff National Park                              | 1955        | 1:190,080    | Mines and Technical Surveys. Surveys and mapping branch                 | National Park Files – Concordia University                                                              |
| Waterton Lakes                                   | 1955        | 1:50,000     | Mines and Technical Surveys. Surveys and mapping branch                 | www.canadiana.ca                                                                                        |

|                       |      |           |                                                                    |                                                                           |
|-----------------------|------|-----------|--------------------------------------------------------------------|---------------------------------------------------------------------------|
| Waterton Lakes Park   | 1958 | 1:63,360  | Mines and Technical Surveys. Surveys and mapping branch            | UBC Koerner Library                                                       |
| Sage Creek            | 1960 | 1:50,000  | Mines and Technical Surveys. Surveys and mapping branch            | www.canadiana.ca                                                          |
| Beaver Mines AB/BC    | 1960 | 1:50,000  | Mines and Technical Surveys. Surveys and mapping branch            | www.canadiana.ca                                                          |
| Beaver Mines AB       | 1960 | 1:50,000  | Mines and Technical Surveys. Surveys and mapping branch            | www.canadiana.ca                                                          |
| Yoho Park             | 1961 | 1:126,720 | Mines and Technical Surveys. Surveys and mapping branch            | National Park Files – Concordia University                                |
| Mount Revelstoke Park | 1963 | 1:50,000  | Department of Mines and Resources. Surveys and Engineering Branch. | National Park Files – Concordia University                                |
| Blairmore AB          | 1967 | 1:50,000  | Surveys and Mapping Branch. Energy, Mines and Resources Canada     | www.canadiana.ca                                                          |
| Pelee Point           | 1969 | 1:25,000  | Surveys and Mapping Branch. Energy, Mines and Resources Canada     | McMaster University Map collections - Ontario Historical Topographic Maps |

## S8 – R packages used in study

Ben-Shachar, M. S., Makowski, D., Lüdtke, D., I., Wiernik, B. M., Thériault, R., Kelley, K., Stanley, D., Caldwell, A., Burnett, J., Karreth, J., & Waggoner, P. (2024). *effectsize: Indices of Effect Size* (0.8.9) [Computer software]. <https://cran.r-project.org/web/packages/effectsize/index.html>

Elzhov, T. V., Mullen, K. M., Spiess, A.-N., & Bolker, B. (2023). *minpack.lm: R Interface to the Levenberg-Marquardt Nonlinear Least-Squares Algorithm Found in MINPACK, Plus Support for Bounds* (1.2-4) [Computer software]. <https://cran.r-project.org/web/packages/minpack.lm/index.html>

Grothendieck, G., & Team (nls), R. C. (2024). *nls2: Non-Linear Regression with Brute Force* (0.3-4) [Computer software]. <https://cran.r-project.org/web/packages/nls2/index.html>

Mazerolle, M. J. (2023). *AICcmodavg: Model Selection and Multimodel Inference Based on (Q)AIC(c)* (2.3-3) [Computer software]. <https://cran.r-project.org/web/packages/AICcmodavg/index.html>

## S9 – R code

```
# Load packages
require(minpack.lm) # Fitting non-linear models
require(nls2) # Fitting non-linear models
require(AICcmodavg) # calculate second order AIC (AICc)
require(effectsize)

#set wd to folder with data
setwd()

### Create the ProgressiveChangeBACIPS function
ProgressiveChangeBACIPS<-function(control, impact, time.true, time.model)
{
  ### STEP 2 - Calculate the delta at each sampling date
  delta <- impact - control
  print(delta)

  # Plot delta against time.true ORIGINAL
  dev.new(width=10, height=5)
  par(mfrow=c(1,2))
  plot(delta~time.true, type="n")
  time.model.of.impact=max(which(time.model==0))
  rect(time.model.of.impact-100, min(delta)-100, time.model.of.impact+1, max(delta)+100, col = "grey")
  points(delta~time.true, pch=24, bg="white", cex=2)

  ### STEP 3 - Fit and compete models
  ## Create a 'period' variable
  period <- ifelse(time.model==0, "Before", "After")

  ## Fit a step model
  step.Model<-aov(delta ~ period)

  ## Fit a linear model
  linear.Model<-lm(delta ~ time.model)

  ## Fit an asymptotic model
  # Create an asymptotic function
  myASYfun<-function(delta, time.model)
  {
    funAsy<-function(parS, time.model) (parS$M * time.model) / (parS$L + time.model) + parS$B
    residFun<-function(p, observed, time.model) observed + funAsy(p,time.model)
    parStart <- list(M=mean(delta[time.model.of.impact:length(time.true)]), B=mean(delta[1:time.model.of.impact]), L=1)
    nls_ASY_out <- nls.lm(par=parStart, fn= residFun, observed=delta, time.model=time.model, control = nls.lm.control(maxfev = integer(), maxiter = 1000))
    foAsy<-delta~(M * time.model) / (L + time.model) + B
    startPar<-c(-coef(nls_ASY_out)[1], coef(nls_ASY_out)[2], coef(nls_ASY_out)[3])
    asyFit<-nls2(foAsy, start=startPar, algorithm="brute-force") # nls2 enables to calculate AICc
    asyFit
  }

  # Fit the asymptotic model
  asymptotic.Model<-myASYfun(delta=delta,time.model=time.model)
```

```

## Fit a sigmoid model
## Create a sigmoid function
mySIGfun<-function(delta, time.model)
{
  funSIG<-function(parS, time.model) (parS$M * (time.model/parS$L)^parS$K) / (1 + (time.model/parS$L) ^ parS$K) + parS$B
  residFun<-function(p, observed, time.model) observed + funSIG(p,time.model)
  parStart <- list(M=mean(delta[time.model.of.impact:length(time.true)]), B=mean(delta[1:time.model.of.impact]), L=mean(time.model), K=5)
  nls_SIG_out <- nls.lm(par=parStart, fn= residFun, observed=delta, time.model=time.model, control=nls.lm.control(maxfev = integer(), maxiter = 1000))
  foSIG<-delta~(M * (time.model/L) ^ K) / (1 + (time.model/L) ^ K) + B
  startPar<-c(-coef(nls_SIG_out)[1],-coef(nls_SIG_out)[2],coef(nls_SIG_out)[3],coef(nls_SIG_out)[4])
  sigFit<-nls2(foSIG, start=startPar, algorithm="brute-force") # nls2 enables to calculate AICc
  sigFit
}

# Fit the sigmoid model
sigmoid.Model<-mySIGfun(delta=delta,time.model=time.model)


## Compare models
# Perform AIC tests
AIC.test<-AIC(step.Model, linear.Model, asymptotic.Model, sigmoid.Model)
AICc.test<-as.data.frame(cbind(AIC.test[,1], c(AICc(step.Model), AICc(linear.Model), AICc(asymptotic.Model), AICc(sigmoid.Model))))
rownames(AICc.test)<-rownames(AIC.test)
names(AICc.test)<-names(AIC.test)

# Calculate AICc weight and select the best model
for(i in 1:dim(AICc.test)[1])
{
  AICc.test$diff[i]<-AICc.test$AIC[i]-min(AICc.test$AIC)
}
AICc.test$RL<-exp(-0.5* AICc.test$diff)
RL_sum<-sum(AICc.test$RL)
AICc.test$aicWeights<-(AICc.test$RL/RL_sum)*100
w<-AICc.test$aicWeights
names(w)<-rownames(AICc.test)

# Display AICc weights
print(w)
barplot(w, col="white", ylab="Relative likelihood (%)", cex.names = 0.9, names.arg =c("Step","Linear","Asymptotic","Sigmoid"))
best.Model<-which(w==max(w))

```

```

#example: Taiga region
# import dataframe
Site<-read.csv("Taiga.csv")

# attach dataframe DON'T FORGET
attach(Site)

#Test assumptions
#Uses graphical techniques due to small sample sizes for individual parks.
summary(Site)

#Normality
par(mfrow=c(1,2))
qqnorm(control)
qqline(control)

qqnorm(impact)
qqline(impact)

#If p-value <= 0.05, data is likely normally distributed.
#DO NOT USE FOR SMALL SAMPLE SIZES. Exploratory graphical techniques best here
shapiro.test(control)
shapiro.test(impact)

#Homoscedasticity. #if box widths are equal, it supports the assumption of homoscedasticity.
boxplot(control)
boxplot(impact)

#Autocorrelation
acf(control)
acf(impact)
#If the values are within confidence intervals, suggests that the autocorrelation is not statistically significant.

# Run ProgressiveChangeBacips function
ProgressiveChangeBACIPS(control, impact, time.true, time.model)

detach(Site)

```



## Supplementary material references

1. Adamczewski, J. Z., Florkiewicz, R. F., & Loewen, V. (2003). *Habitat Management in the Yukon Winter Range of the Little Rancheria Caribou Herd* (TR-03-02). Department of Environment, Government of the Yukon.
2. Alberta Government. (2024). *Landscape Connectivity Indicator for Alberta—Open Government*. <https://open.alberta.ca/opendata/gda-0f23e47d-fce1-4636-8760-02df5f83c18e>. Accessed 18<sup>th</sup> June 2024.;
3. Apps, C. D., & McLellan, B. N. (2006). Factors influencing the dispersion and fragmentation of endangered mountain caribou populations. *Biological Conservation*, 130(1), 84–97. <https://doi.org/10.1016/j.biocon.2005.12.004>
4. Arlt, M. L., & Manseau, M. (2011). Historical changes in caribou distribution and land cover in and around Prince Albert National Park: Land management implications. *Rangifer*, 19, 17–31.
5. Cole, J. R., Kross, A., & Jaeger, J. A. G. (2023). Monitoring changes in landscape structure in the Adirondack-to-Laurentians (A2L) transboundary wildlife linkage between 1992 and 2018: Identifying priority areas for conservation and restoration. *Landscape Ecology*, 38(2), 383–408. <https://doi.org/10.1007/s10980-022-01561-2>
6. COSEWIC. (2015). *COSEWIC assessment and status report on the Peary Caribou Rangifer tarandus pearyi in Canada* (xii). Committee on the Status of Endangered Wildlife in Canada.
7. Gunn, A., D'Hont, A., Williams, J., & Boulanger, J. (2013). *Satellite Collaring in the Bathurst Herd of Barren-ground Caribou 1996-2005* (Manuscript Report 225). Environment and Natural Resources, Government of the Northwest Territories.
8. Habitat. (2022). *Planning the conservation of La Mauricie National Park's Greater Ecosystem/Évaluation de la connectivité écologique sur le territoire du parc national de la Mauricie. Pour Parcs Canada*. <https://en.habitat-nature.com/nosprojets/parcscanada>. Accessed 15<sup>th</sup> June 2024.
9. Leroux, S. J., & Kerr, J. T. (2013). Land development in and around protected areas at the wilderness frontier. *Conservation Biology: The Journal of the Society for Conservation Biology*, 27(1), 166–176. <https://doi.org/10.1111/j.1523-1739.2012.01953.x>
10. Nature Conservancy of Canada. (2017). *Connectivity: Passages for species to migrate*. <https://www.natureconservancy.ca/en/where-we-work/quebec/our-work/.../connectivity.html>. Accessed 18<sup>th</sup> June 2024.
11. Nature Conservancy of Canada. (2023). *Program launched to accelerate conservation of areas around Canada's National Parks*. <https://www.natureconservancy.ca/en/who-we-are/news-room/news-releases/.../program-launched-to.html>. Accessed 18<sup>th</sup> June 2024.
12. Parks Canada Agency, G. of C. (n.d.). *Bison and Banff National Park*. Retrieved July 15, 2024, from <http://www.parkscanadahistory.com/publications/banff/plains-bison-restoration-faq.pdf>
13. Parks Canada Agency, G. of C. (2018, April 27). *Like Distant Thunder: Canada's Bison Conservation Story*. [https://parks.canada.ca/pn-np/ab/elkisland/nature/~link.aspx?\\_id=A5536377F42045F69F97C73DF37EA018&\\_z=z](https://parks.canada.ca/pn-np/ab/elkisland/nature/~link.aspx?_id=A5536377F42045F69F97C73DF37EA018&_z=z). Accessed 15<sup>th</sup> June 2024.
14. Parks Canada Agency, G. of C. (2023a, June 19). *Report on the Plains Bison Reintroduction Pilot, 2017-2022—May 2023*. <https://parks.canada.ca/pn->

- np/ab/banff/info/gestion-management/bison/rapport-mai-reintroduction-may-report. Accessed 15<sup>th</sup> June 2024.
15. Parks Canada Agency, G. of C. (2023b, November 10). *National Program for Ecological Corridors—Nature and science*. <https://parks.canada.ca/nature/science/conservation/corridors-ecologiques-ecological-corridors>. Accessed 15<sup>th</sup> December 2023
  16. Parks Canada Agency, G. of C. (2023c, December 4). *Elk Island National Park of Canada Management Plan, 2023*. <https://parks.canada.ca/pn-np/ab/elkiland/info/plan/gestion-management-2023>. Accessed 15<sup>th</sup> June 2024.
  17. Parks Canada Agency, G. of C. (2023d, December 21). *Connecting wildlife habitats for a healthy planet—Nature and science*. <https://parks.canada.ca/nature/science/conservation/connectivite-connectivity>. Accessed 15<sup>th</sup> June 2024.
  18. Parks Canada Agency, G. of C. (2024, March 1). *Protecting the wood turtle at risk—La Mauricie National Park—Protecting the wood turtle at risk*. <https://parks.canada.ca/pn-np/qc/mauricie/nature/conservation/protection-protecting/tortue-des-bois-wood-turtle>. Accessed 17<sup>th</sup> June 2024.
  19. Parrott, L., Kyle, C., Hayot-Sasson, V., Bouchard, C., & Cardille, J. A. (2019). Planning for ecological connectivity across scales of governance in a multifunctional regional landscape. *Ecosystems and People*, 15(1), 204–213. <https://doi.org/10.1080/26395916.2019.1649726>
  20. Pedersen, S. H., Bentzen, T. W., Reinking, A. K., Liston, G. E., Elder, K., Lenart, E. A., Prichard, A. K., & Welker, J. M. (2021). Quantifying effects of snow depth on caribou winter range selection and movement in Arctic Alaska. *Movement Ecology*, 9(1), 48. <https://doi.org/10.1186/s40462-021-00276-4>
  21. Person, B., Prichard, A., Carroll, G., Yokel, D., Suydam, R., & George, J. (2009). Distribution and Movements of the Teshekpuk Caribou Herd 1990 - 2005: Prior to Oil and Gas Development. *ARCTIC*, 60. <https://doi.org/10.14430/arctic216>
  22. Poole, K., Gunn, A., Patterson, B., & Dumond, M. (2010). Sea Ice and Migration of the Dolphin and Union Caribou Herd in the Canadian Arctic: An Uncertain Future. *Arctic*, 63, 414–428. <https://doi.org/10.14430/arctic3331>
  23. Roch, L., & Jaeger, J. A. G. (2014). Monitoring an ecosystem at risk: What is the degree of grassland fragmentation in the Canadian Prairies? *Environmental Monitoring and Assessment*, 186(4), 2505–2534. <https://doi.org/10.1007/s10661-013-3557-9>
  24. Russell, D., & Gunn, A. (2019). *Vulnerability analysis of the Porcupine Caribou Herd to potential development of the 1002 lands in the Arctic National Wildlife Refuge, Alaska* (p. 143). Environment Yukon, Canadian Wildlife Service, and NWT Environment and Natural Resources.
  25. Soverel, N. O., Coops, N. C., White, J. C., & Wulder, M. A. (2010). Characterizing the forest fragmentation of Canada's national parks. *Environmental Monitoring and Assessment*, 164(1–4), 481–499. <https://doi.org/10.1007/s10661-009-0908-7>
  26. Staying Connected Initiative 2022. (2023, September 13). *The Staying Connected Initiative*. ArcGIS StoryMaps. <https://storymaps.arcgis.com/stories/8905860a33fb4118aba55be06a765c8a>. Accessed 19<sup>th</sup> June 2024.

27. Wakkinen, W. L., & Sloane, B. (2010). *Selkirk Ecosystem Woodland Caribou Analysis*. Idaho Department of Fish and Game.
28. Yellowstone to Yukon Conservation Initiative. (2024). *Introducing Y2Y*.  
<https://y2y.net/wp-content/uploads/2024/05/2024-IntroToY2Y-web.pdf>
